# Supplementary material
Source: PubMed Central journal article supplement (PMC8215461)
Supplement: plantbiotechnology-38-1-20.1126a-s001.pdf [file plantbiotechnology-38-1-20.1126a-s001.pdf]

SUPPLEMENTAL FIGURES

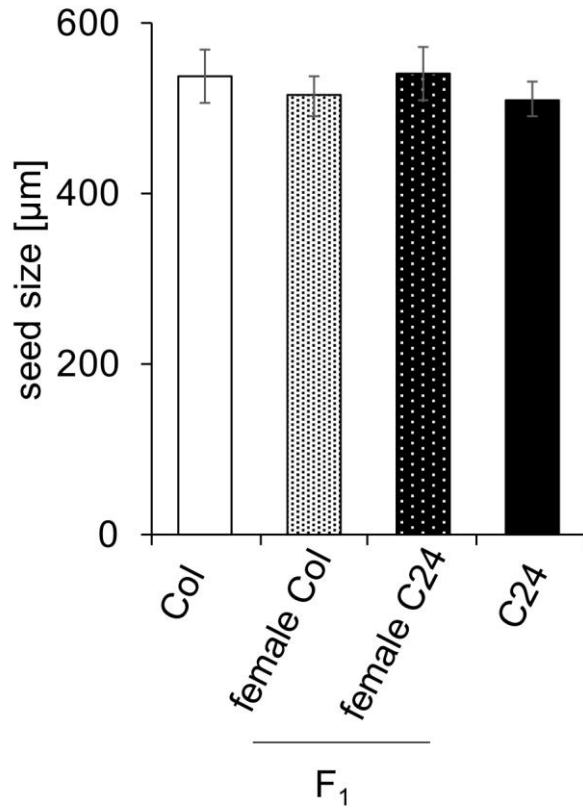

Supplementary Figure S1. The average seed sizes of Col, C24 and their F<sub>1</sub> hybrids.

The major axis of each seed was measured using ImageJ software.  $n \geq 53$ .

11

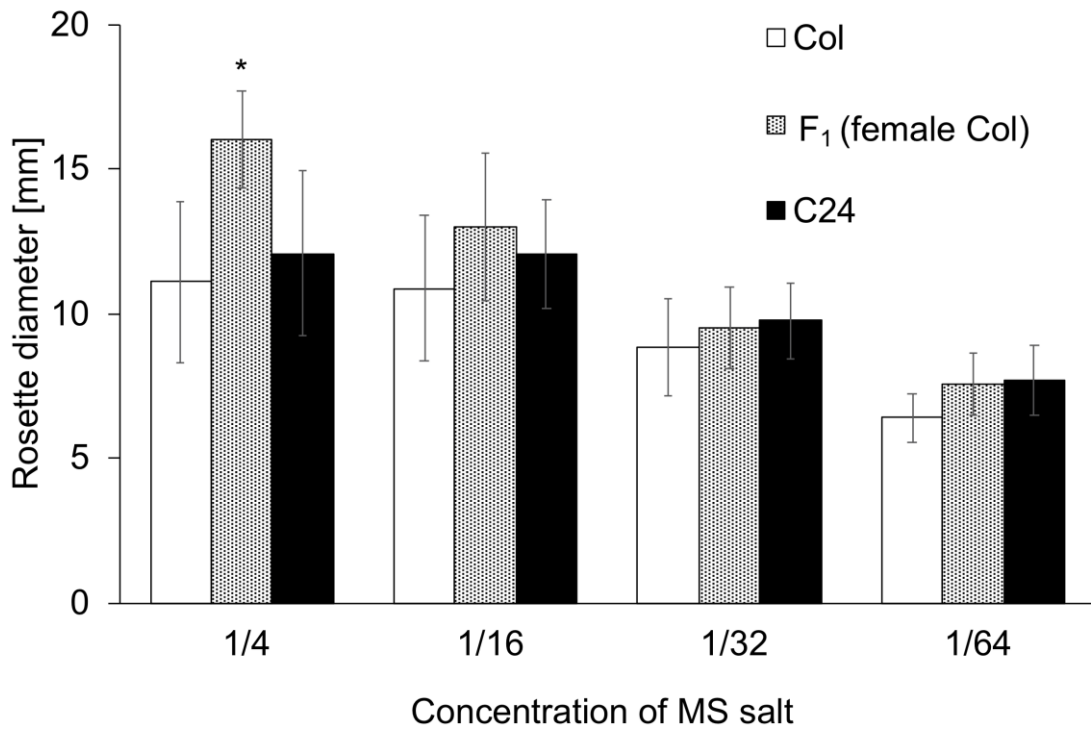

12

13

14 **Supplementary Figure S2. Rosette diameter of F<sub>1</sub> hybrid and parents in N-limited**

15 **condition.** MS salt concentrations were modified for each condition. Rosette diameters

16 of Col, C24, and F<sub>1</sub> hybrid (female Col) plants were measured at 14 DAS.  $n \geq 13$ .

17 Asterisks (\*) indicate significant differences between F<sub>1</sub> hybrid values and MPV based

18 on Student's *t*-test ( $p < 0.05$ ).

19

20

A: Biological Process

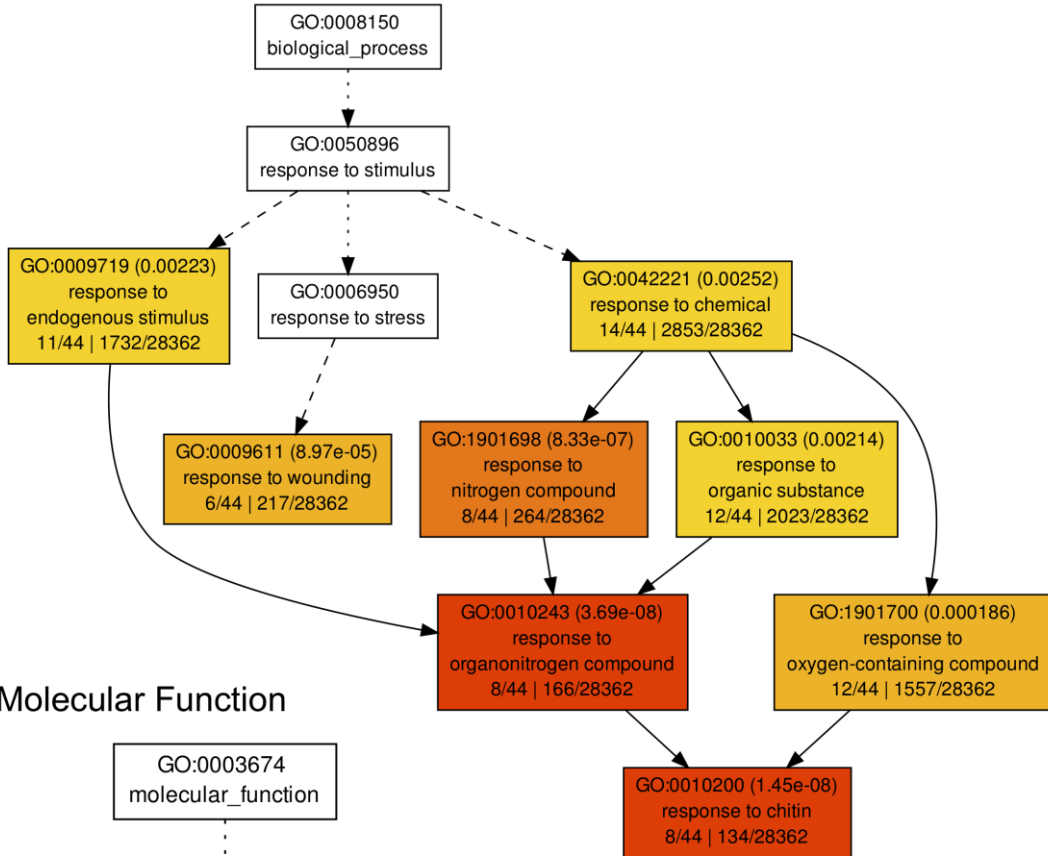

B: Molecular Function

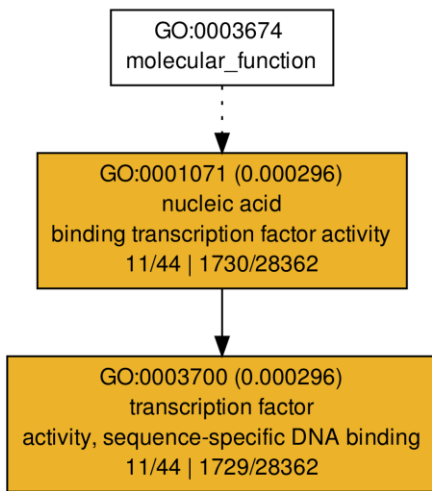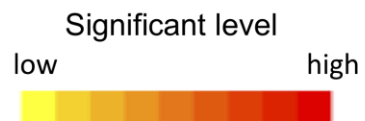

25 **0.58, FDR < 0.05**). SEA was performed using agriGO ([bioinfo.cau.edu.cn/agriGO/](http://bioinfo.cau.edu.cn/agriGO/)). A:  
26 The “Biological Process” for each GO term was used for the hierarchical graph. B:  
27 “Molecular Function” of the GO term was used for the hierarchical graph. Solid arrows  
28 represent relationships between the two enriched GO terms. Dashed arrows represent  
29 relationships between the enriched and un-enriched terms. Dotted arrows represent  
30 relationships between un-enriched terms. Significantly enriched GO terms are colored  
31 on a spectrum from white to red according to their corresponding FDR adjusted *p*-value.

32

33

34

35

36

37

38

39

40

A: Biological Process

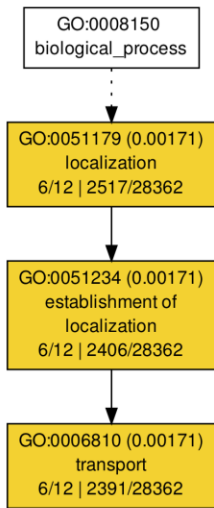

B: Cellular Component

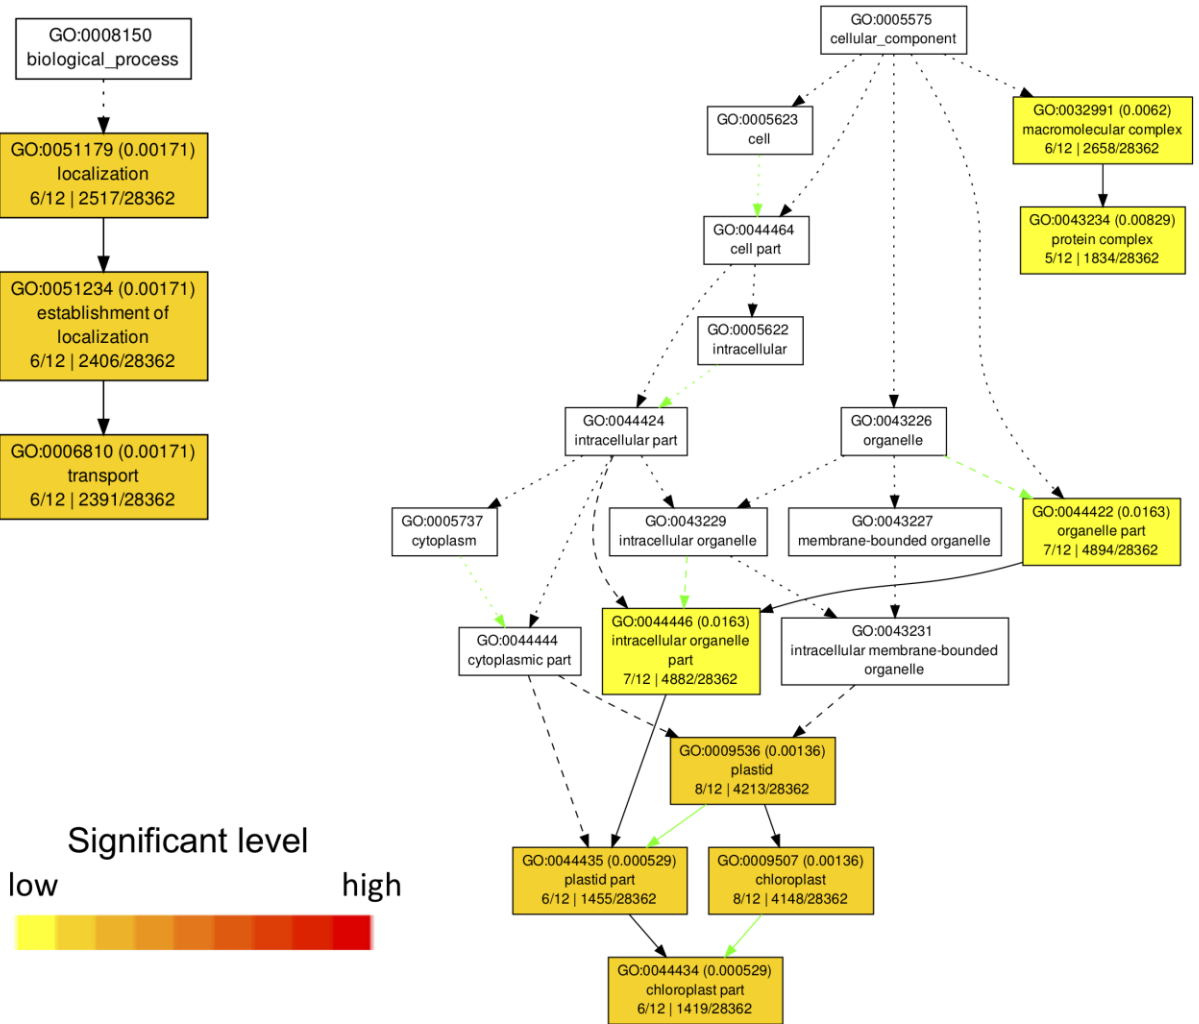

42

43 **Supplementary Figure S4. Overview of singular enrichment analysis (SEA) of**  
 44 **down-regulated transcript profiles in F<sub>1</sub> hybrid compared with parents ( $\log_2FC \leq$**   
 45  **$-0.58$ ,  $FDR < 0.05$ ). SEA was performed using agriGO (bioinfo.cau.edu.cn/agriGO/). A:**

46 The “Biological Process” for each GO term was used for the hierarchical graph. B:  
47 “Cellular Component” of the GO term was used for the hierarchical graph. Solid arrows  
48 represent relationships between two enriched GO terms. Dashed arrows represent  
49 relationships between enriched and un-enriched terms. Dotted arrows represent  
50 relationships between un-enriched terms. Green dotted arrows represent negative  
51 regulation. Significantly enriched GO terms are colored on a spectrum from white to red  
52 according to their corresponding FDR adjusted  $p$ -values.

53

54

55

56

57

58

59

60

61

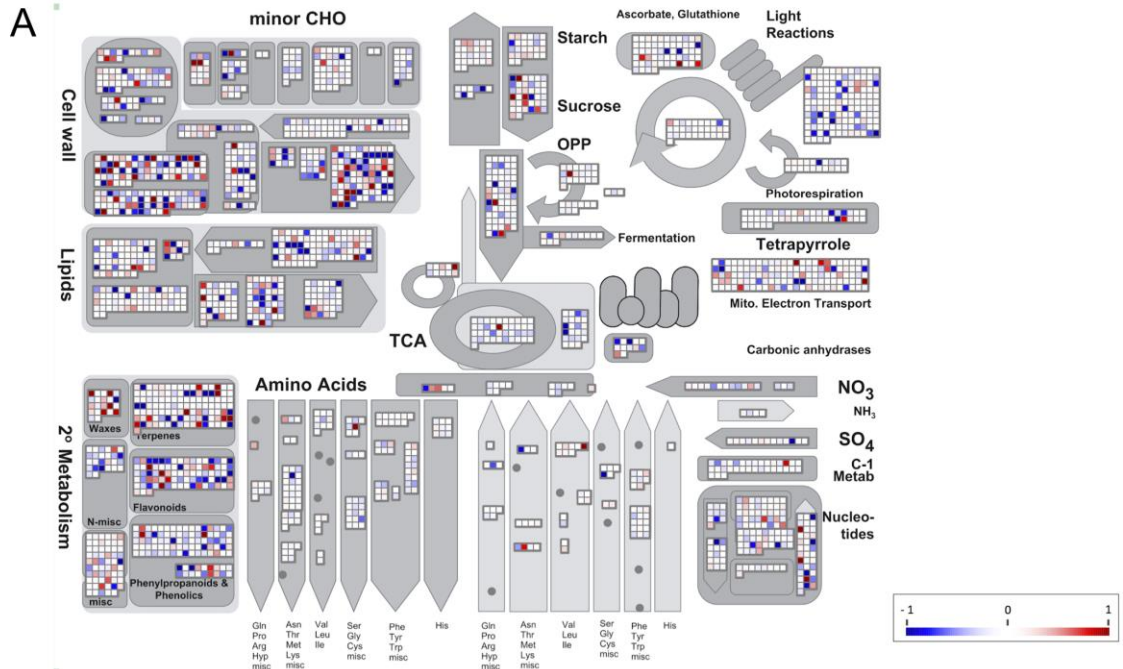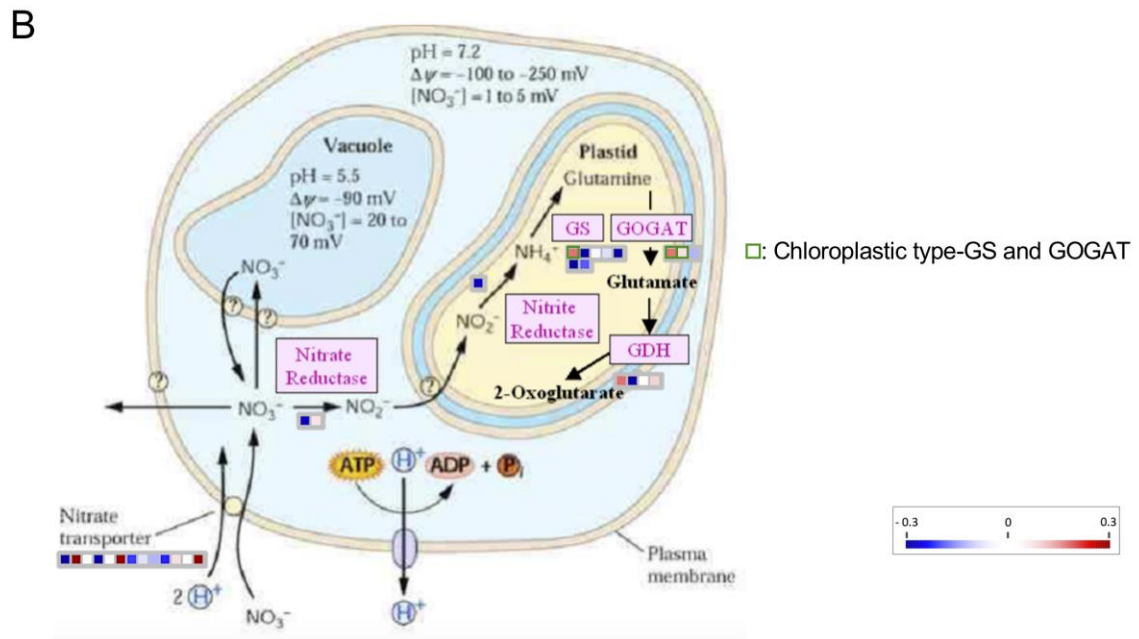

66 **MapMan tool.** Differences in F<sub>1</sub> hybrid transcript levels vs MPV based on probe sets  
67 classified as “metabolism overview” (A) and “N-metabolism” (B) are shown. Red and  
68 blue colors indicate that transcript levels are increased or decreased, respectively, in F<sub>1</sub>  
69 hybrid compared to parents. All values indicate log<sub>2</sub> ratios (F<sub>1</sub>/MPV) at 15 DAS  
70 produced using the Arabidopsis ATH1 Array. The MapMan tool was used for  
71 visualization of gene expression differences between F<sub>1</sub> hybrid transcript levels and  
72 MPV. The number of biological replicates is three.
