# Supplementary material
Source: PubMed Central journal article supplement (PMC8215461)
Supplement: plantbiotechnology-38-1-20.1126a-s002.pdf [file plantbiotechnology-38-1-20.1126a-s002.pdf]

**Supplementary Table S1. Primer sequences for qPCR**

| <b>Primer name</b>                        | <b>sequence(5'→3')</b>       |
|-------------------------------------------|------------------------------|
| Gln1;1-RF (Ishiyama et al. 2004 )         | CATCAACCTTAACCTCTCAGACTCCACT |
| Gln1;1-RR (Ishiyama et al. 2004 )         | ACTTCAGCTGCAACATCAGGGTTGCTA  |
| Gln1;2-RF (Ishiyama et al. 2004 )         | TGTTAACCTTGACATCTCAGACAACAGT |
| Gln1;2-RR (Ishiyama et al. 2004 )         | ACTTCAGCAATAACATCAGGGTTAGCA  |
| Gln1;3-RF (Ishiyama et al. 2004 )         | CGTTAACCTCAACCTCACCGATGCCACC |
| Gln1;3-RR (Ishiyama et al. 2004 )         | TCCTCCTTGGCAACGTCGGGGTGGCTG  |
| NADH-GOGAT_F                              | ATCGTCATTTTCCGCTGTTC         |
| NADH-GOGAT_R                              | TTGCTCTCACAACCACAAGC         |
| GLN2_F                                    | CACCAAACCTTACTCTGACAGG       |
| GLN2_R                                    | CACTATCTTCACCAGGTGCTTG       |
| qGLU1_ forward (Takabayashi et al. 2016 ) | TTGGGACAGGATGTTGTTGA         |
| qGLU1_reverse (Takabayashi et al. 2016 )  | GCCTTCACCCAGAAAGACAA         |
| qGLU2_ forward (Takabayashi et al. 2016 ) | GCTGGGATGACAGGTGGATTG        |
| qGLU2_reverse (Takabayashi et al. 2016 )  | AAGCTGTGTTTGTCCCACTGG        |
| AT3G55410_F                               | AGGATGTCTGAACGAGGAACA        |
| AT3G55410_R                               | TAACCCAATTCGAACCCAAG         |
| UBQ2_F (Ishiyama et al. 2004 )            | CCAAGATCCAGGACAAAGAAGGA      |
| UBQ2_R (Ishiyama et al. 2004 )            | TGGAGACGAGCATAACACTTGC       |





**Supplementary Table S4. Significant GO term of the differentially expressed genes in F1 hybrid**

Significantly up- or down-regulated genes between F1 hybrid and parents was described in Supplemental table 2.

agriGO (bioinfo.cau.edu.cn/agriGO/) was used for singular enrichment analysis(SEA) of the differentially expressed genes in the F1 hybrid.

Ontology; P = Biological process, F = Molecular function, C = Cellular component.

**Significant GO term of the up-regulated genes in F1 Hybrid**

| GO term    | Ontology | Description                                                  | Number in input list | Number in BG/Ref | FDR     |
|------------|----------|--------------------------------------------------------------|----------------------|------------------|---------|
| GO:0010200 | P        | response to chitin                                           | 8                    | 134              | 1.4E-08 |
| GO:0010243 | P        | response to organonitrogen compound                          | 8                    | 166              | 3.7E-08 |
| GO:1901698 | P        | response to nitrogen compound                                | 8                    | 264              | 8.3E-07 |
| GO:0009611 | P        | response to wounding                                         | 6                    | 217              | 0.00009 |
| GO:1901700 | P        | response to oxygen-containing compound                       | 12                   | 1557             | 0.00019 |
| GO:0010033 | P        | response to organic substance                                | 12                   | 2023             | 0.0021  |
| GO:0009719 | P        | response to endogenous stimulus                              | 11                   | 1732             | 0.0022  |
| GO:0042221 | P        | response to chemical                                         | 14                   | 2853             | 0.0025  |
| GO:0001071 | F        | nucleic acid binding transcription factor activity           | 11                   | 1730             | 0.0003  |
| GO:0003700 | F        | transcription factor activity, sequence-specific DNA binding | 11                   | 1729             | 0.0003  |

**Significant GO term of the down-regulated genes in F1 Hybrid**

| GO term    | Ontology | Description                   | Number in input list | Number in BG/Ref | FDR     |
|------------|----------|-------------------------------|----------------------|------------------|---------|
| GO:0006810 | P        | transport                     | 6                    | 2391             | 0.0017  |
| GO:0051234 | P        | establishment of localization | 6                    | 2406             | 0.0017  |
| GO:0051179 | P        | localization                  | 6                    | 2517             | 0.0017  |
| GO:0044435 | C        | plastid part                  | 6                    | 1455             | 0.00053 |
| GO:0044434 | C        | chloroplast part              | 6                    | 1419             | 0.00053 |
| GO:0009536 | C        | plastid                       | 8                    | 4213             | 0.0014  |
| GO:0009507 | C        | chloroplast                   | 8                    | 4148             | 0.0014  |
| GO:0032991 | C        | macromolecular complex        | 6                    | 2658             | 0.0062  |
| GO:0043234 | C        | protein complex               | 5                    | 1834             | 0.0083  |
| GO:0044446 | C        | intracellular organelle part  | 7                    | 4882             | 0.016   |
| GO:0044422 | C        | organelle part                | 7                    | 4894             | 0.016   |
